# Supplementary material for: Exosomal miRNA‐215‐5p Derived from Adipose‐Derived Stem Cells Attenuates Epithelial–Mesenchymal Transition of Podocytes by Inhibiting ZEB2
Source: Hindawi journal article supplement (doi:10.1155/2020/2685305), 2020-01-01
Supplement: f1 [file 2685305.f1.pdf]

**Figure. S1**

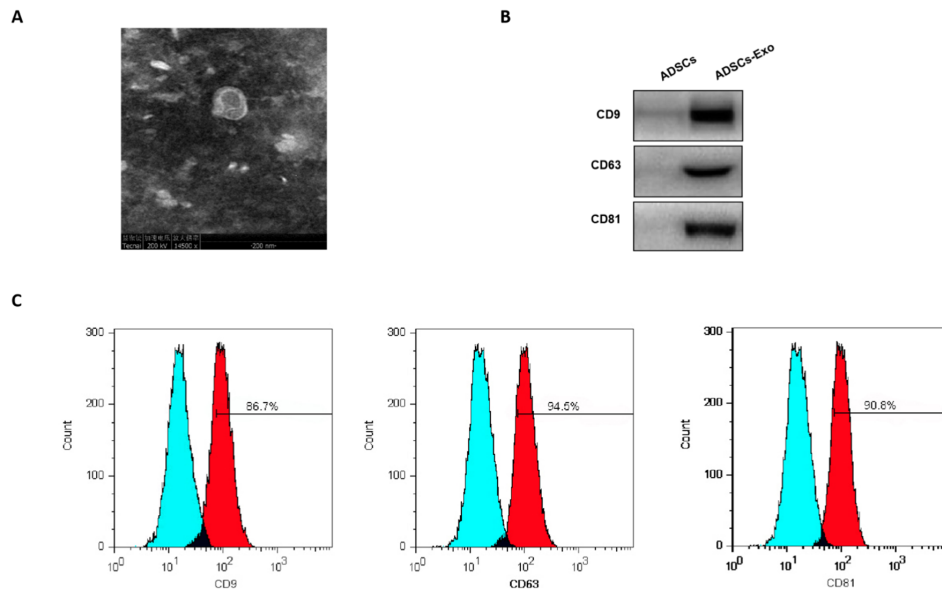

**Figure S1. Identification of exosomes derived from mouse ADSCs. (A)** Representative micrographs of transmission electron microscopy of purified exosomes derived from ADSCs, Scale bar = 100 nm. **(B)** Identification of exosomes derived from ADSCs, CD9, CD63, and CD81 expression by Western blotting. **(C)** Purity identification of ADSCs-Exo by flow cytometry using CD9, CD63 and CD81 antibodies.

**Figure. S2**

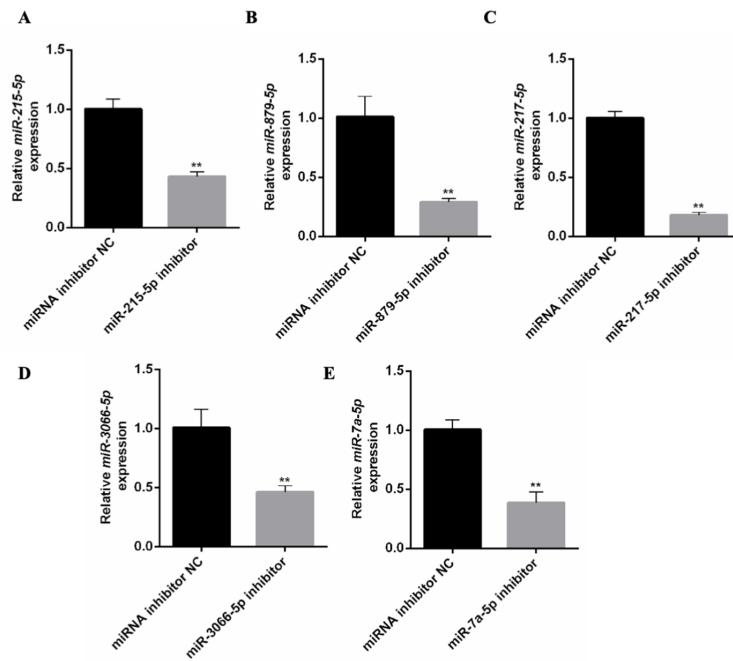

**Figure S2. Evaluation of the inhibitory effect of EMT-related miRNAs.** The expression of miR-215-5p (A), miR-879-5p(B), miRNA-217a-5p(C), miRNA-3066-5p(D) and miRNA-7a-5p(E) were determined by qRT-PCR in MPC5 cells. \*,  $P < 0.05$ ; \*\*,  $P < 0.01$ .
